# Supplementary material
Source: PubMed Central journal article supplement (PMC7384260)
Supplement: NIHMS1589996-supplement-1589996_Supp_Tab1.pdf [file NIHMS1589996-supplement-1589996_Supp_Tab1.pdf]

### Supplementary Table 1: Q-PCR primers.

| Gene          | Forward Primer                | Reverse Primer                 |
|---------------|-------------------------------|--------------------------------|
| <i>Arbp</i>   | 5'-CACTGGTCTAGGACCCGAGAA-3'   | 5'-CACTGGTCTAGGACCCGAGAA-3'    |
| <i>Stat3</i>  | 5'-CCTGGTGTGAACTACTCAGG-3'    | 5'-TATACTTTTTTACAAGGTCG-3'     |
| <i>Glut4</i>  | 5'-GTGACTGGAACACTGGTCCTA-3'   | 5'-CCAGCCACGTTGCATTGTAG-3'     |
| <i>pparg</i>  | 5'-TCGCTGATGCACTGCCTATG-3'    | 5'-GAGAGGTCCACAGAGCTGATT-3'    |
| <i>ACC</i>    | 5'-TAATGGGCTGCTTCTGTGACTC-3'  | 5'-CTCAATATCGCCATCAGTCTTG-3'   |
| <i>Fas</i>    | 5'-GGAGGTGGTGATAGCCGGTAT-3'   | 5'-TGGGTAATCCATAGAGCCCAG-3'    |
| <i>Scd1</i>   | 5'-GCTGGAGTACGTCTGGAGGAA-3'   | 5'-TCCCGAAGAGGCAGGTGTAG-3'     |
| <i>scd2</i>   | 5'-GCATTTGGGAGCCTTGTACG-3'    | 5'-AGCCGTGCCTTGTATGTTCTG-3'    |
| <i>Srebp</i>  | 5'-GATGTGCGAACTGGACACAG-3'    | 5'-CATAGGGGGCGTCAAACAG-3'      |
| <i>Adrb3</i>  | 5'-TAGCCATCAAACCTGTTGAGC-3'   | 5'-GGCCCTCTCTAGTTCCCAG-3'      |
| <i>Cidea</i>  | 5'-TGACATTCATGGGATTGCAGAC-3'  | 5'-GGCCAGTTGTGATGACTAAGAC-3'   |
| <i>Dio2</i>   | 5'-AATTATGCCTCGGAGAAGAACG-3'  | 5'-GGCAGTTGCCTAGTGAAAGGT-3'    |
| <i>Elovl3</i> | 5'-TTCTCACGCGGGTAAAAATGG-3'   | 5'-GAGCAACAGATAGACGACCAC-3'    |
| <i>Ucp1</i>   | 5'-AGGCTTCCAGTACCATTAGGT-3'   | 5'-CTGAGTGAGGCAAAGCTGATTT-3'   |
| <i>Acox1</i>  | 5'-TAACTTCCTCACTCGAAGCCA-3'   | 5'-AGTTCCATGACCCATCTCTGTC-3'   |
| <i>Cpt1a</i>  | 5'-ACCAACGGGCTCATCTTCTAA-3'   | 5'-CAAAATGACCTAGCCTTCTATCGA-3' |
| <i>Ucp2</i>   | 5'-ACTTTCCTCTGGATAACGG-3'     | 5'-ACGGAGGCAAAGCTCATCTG-3'     |
| <i>Gpx7</i>   | 5'-TCCGAGCAGGACTTCTACGAC-3'   | 5'-TCTCCCTGTTGGTGTCTGGTT-3'    |
| <i>Prdx5</i>  | 5'-GGCTGTTCTAAGACCCACCTG-3'   | 5'-GGAGCCGAACCTTGCCTTC-3'      |
| <i>Prdx6</i>  | 5'-CGCCAGAGTTTGCCAAGAG-3'     | 5'-TCCGTGGGTGTTTCACCATTG-3'    |
| <i>Cox4</i>   | 5'-ATTGGCAAGAGAGCCATTTCTAC-3' | 5'-CACGCCGATCAGCGTAAGT-3'      |
| <i>Cox7a1</i> | 5'-GCTCTGGTCCGGTCTTTTAGC-3'   | 5'-GTACTGGGAGGTCATTGTCCG-3'    |
| <i>Cox7a2</i> | 5'-GCTGGCCCTTCGTCAGATT-3'     | 5'-GGCATCCCATTATCCTCCTGAA-3'   |
| <i>Cox8b</i>  | 5'-TGTGGGGATCTCAGCCATAGT-3'   | 5'-AGTGGGCTAAGACCCATCCTG-3'    |
