# Supplementary material
Source: PubMed Central journal article supplement (PMC7384260)

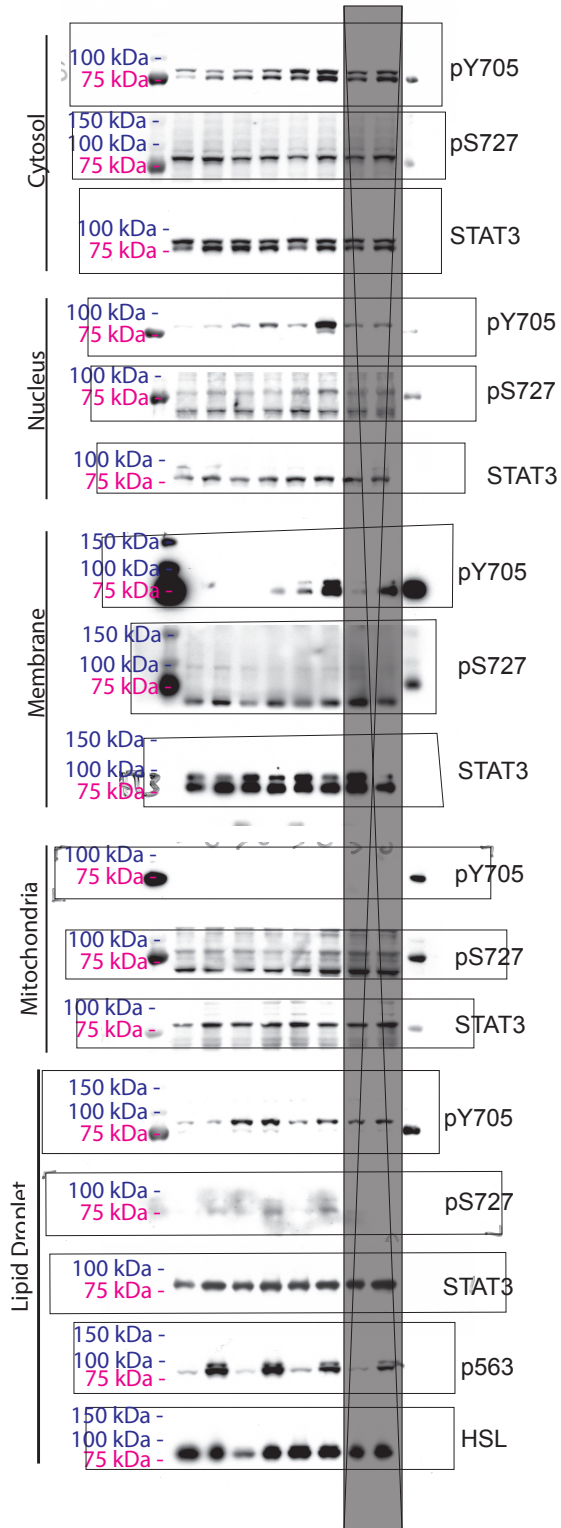

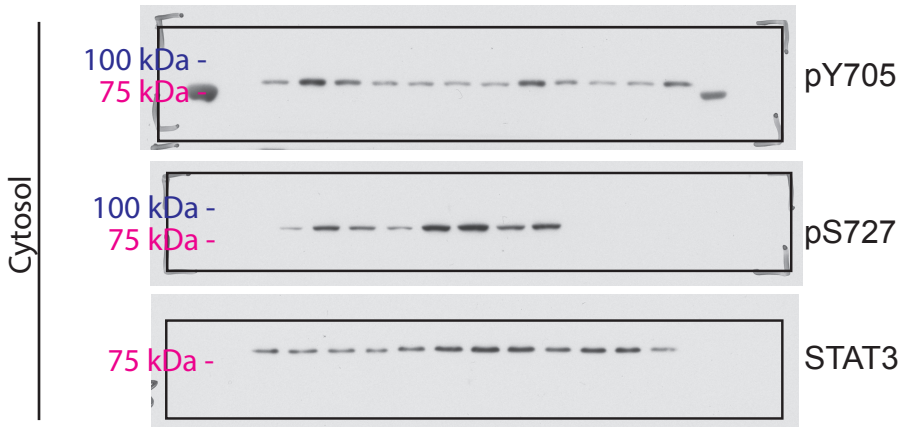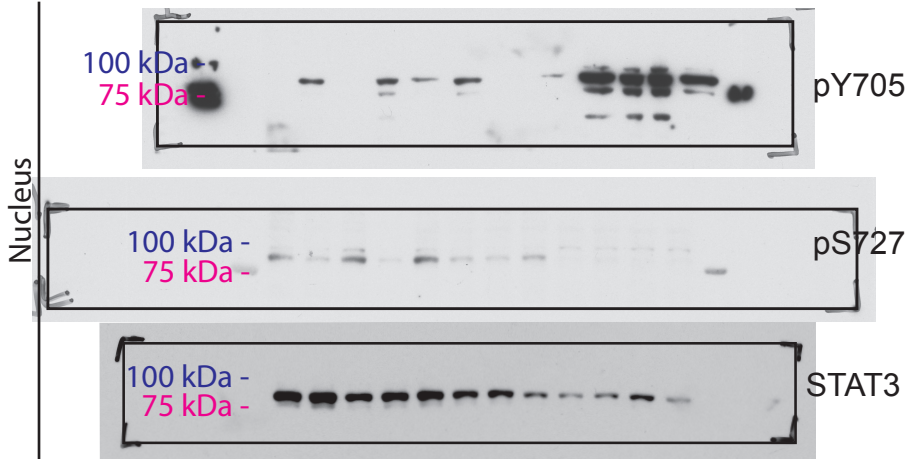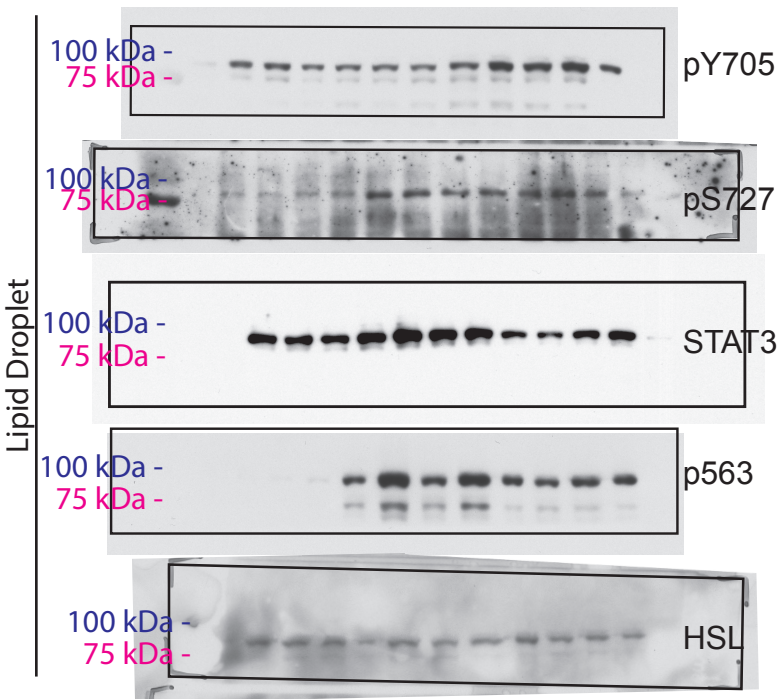

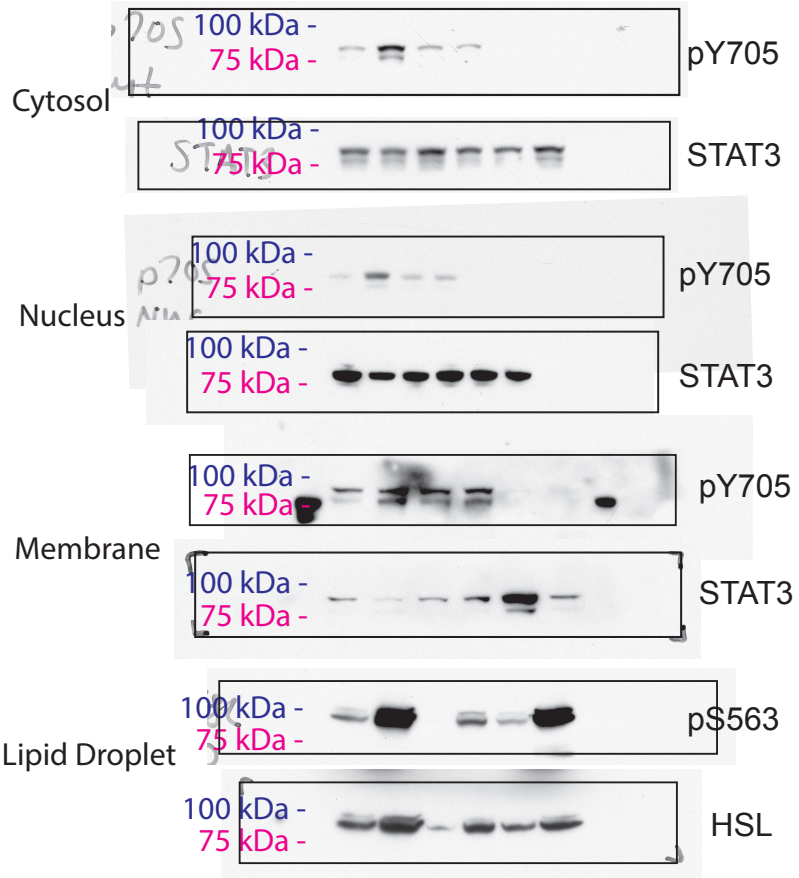

100 kDa -  
75 kDa - pS727

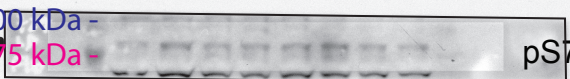

100 kDa -  
75 kDa - STAT3

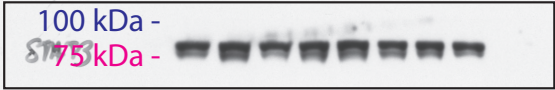

100 kDa -  
75 kDa - pS563

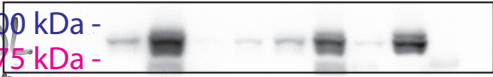

100 kDa -  
75 kDa - HSL

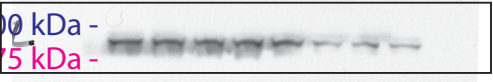



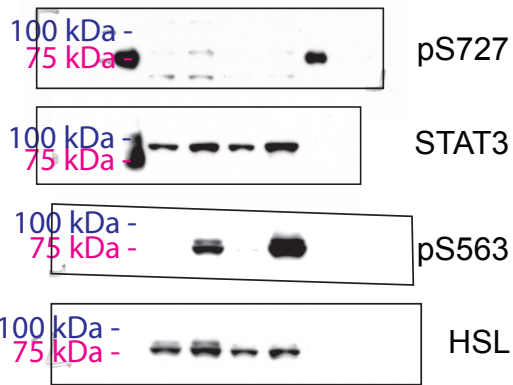

Supplement: NIHMS1589996-supplement-1589996_SourceData_Fig2.pdf [file NIHMS1589996-supplement-1589996_SourceData_Fig2.pdf]

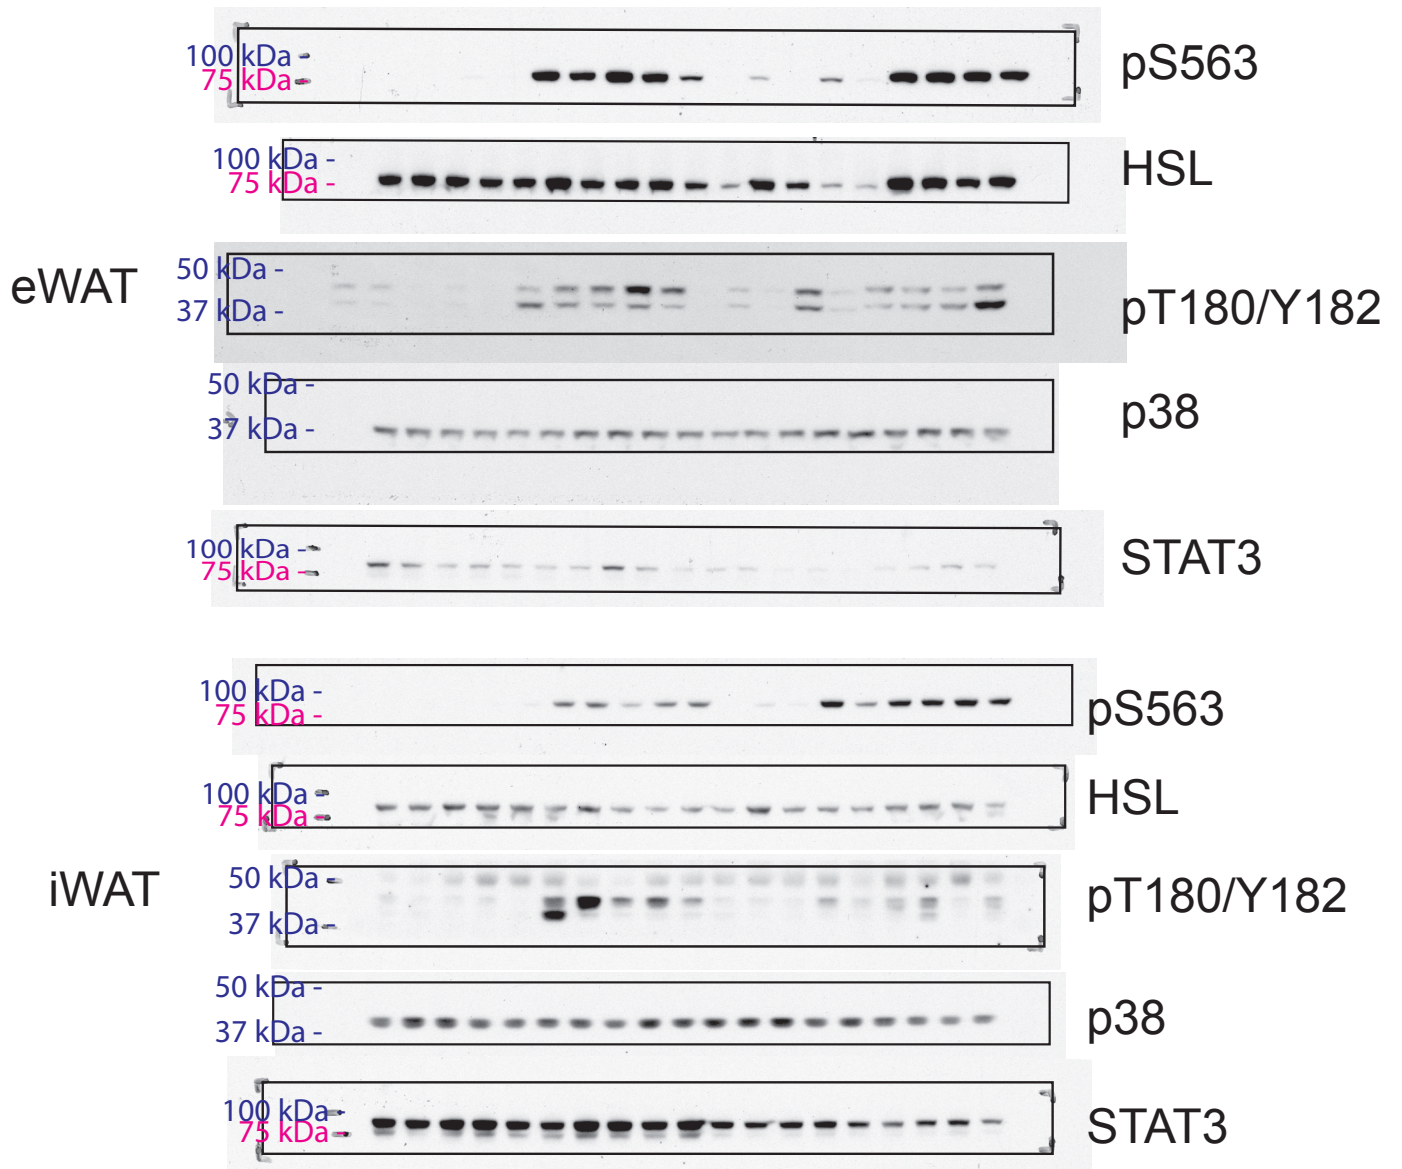

Supplement: NIHMS1589996-supplement-1589996_SourceData_Fig4.pdf [file NIHMS1589996-supplement-1589996_SourceData_Fig4.pdf]

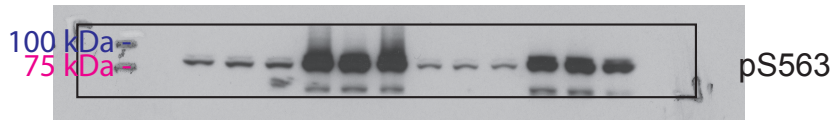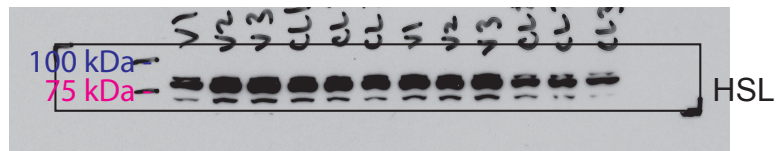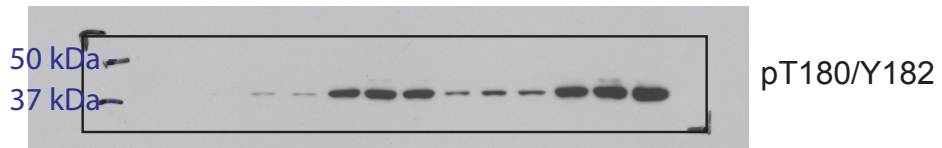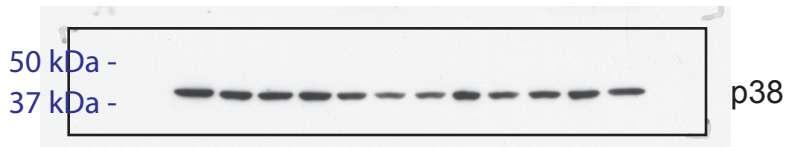

Supplement: NIHMS1589996-supplement-1589996_SourceData_Fig5.pdf [file NIHMS1589996-supplement-1589996_SourceData_Fig5.pdf]

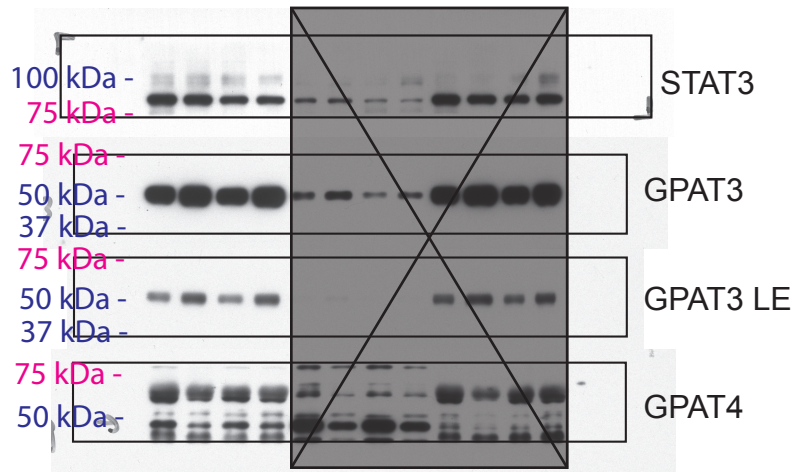

Supplement: NIHMS1589996-supplement-1589996_SourceData_Fig8.pdf [file NIHMS1589996-supplement-1589996_SourceData_Fig8.pdf]
